# Supplementary material for: Correlation between Functional Magnetic Resonance and Symptomatologic Examination in Adult Patients with Myofascial Pain Syndrome of the Masticatory Muscles
Source: MDPI journal article supplement (doi:10.3390/app13137934), 2023-07-06
Supplement: s1 [file s1]

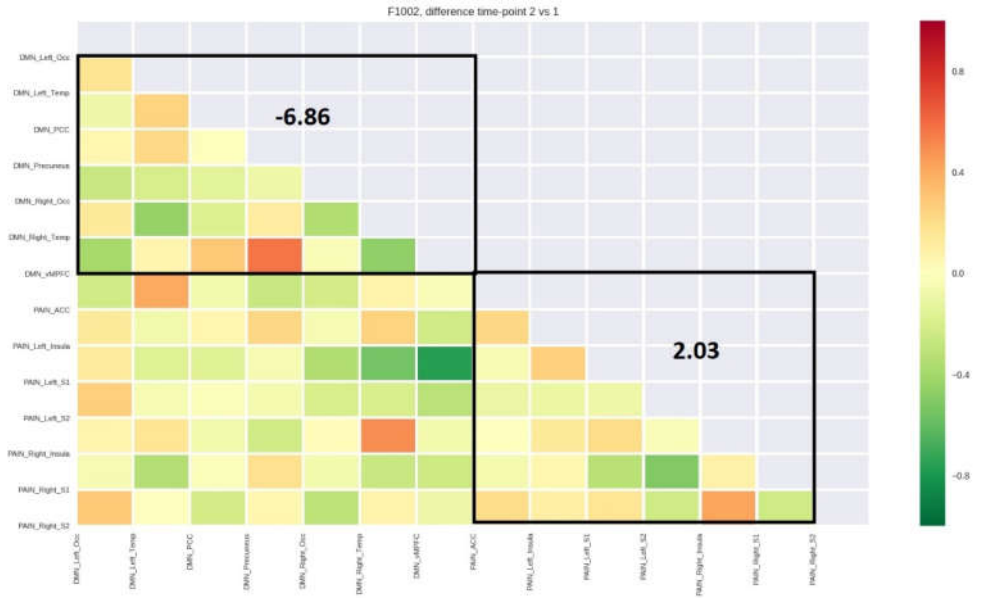

**Figure S1.** Matrix difference  $t_2-t_1$  of the first patient, and DMN and PN average connectivity. The box above encloses the DMN area, and the box below encloses the PN area; these average network connectivity values are specified.

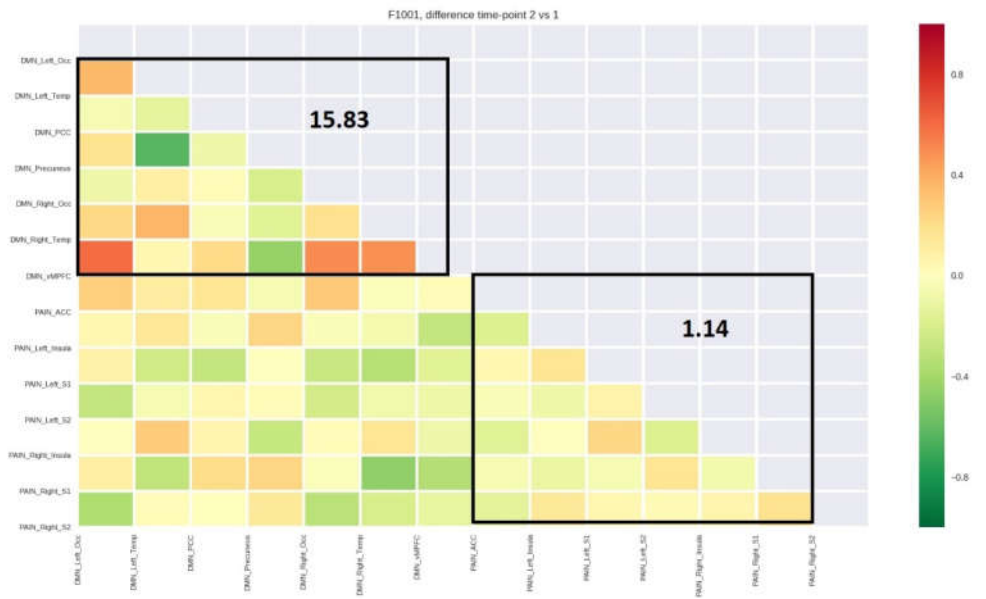

**Figure S2.** Matrix difference  $t_2-t_1$  of the second patient, and DMN and PN average connectivity. The box above encloses the DMN area, and the box below encloses the PN area; these average network connectivity values are specified.

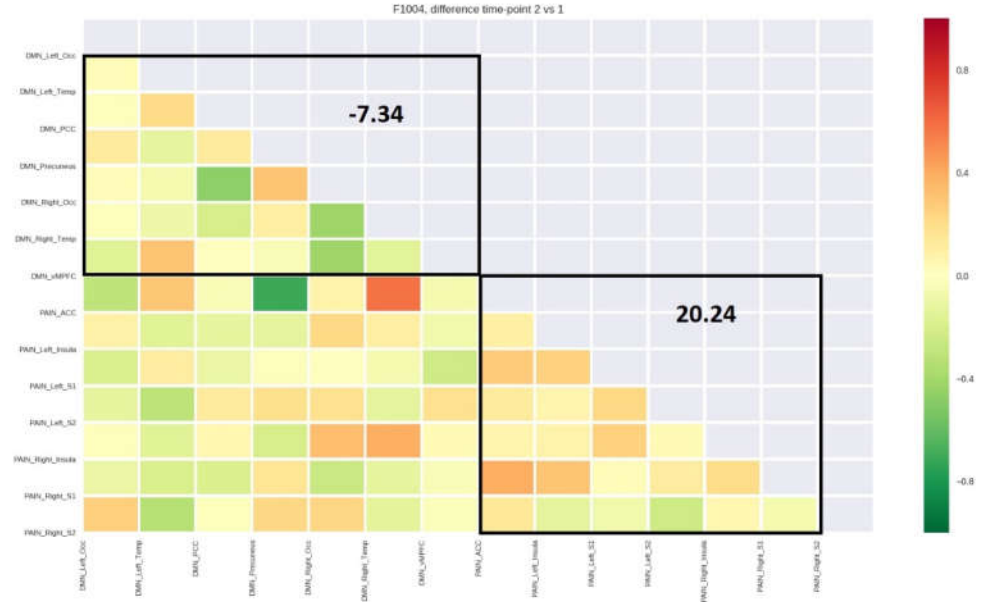

**Figure S3.** Matrix difference t2-t1 of the third patient, and DMN and PN average connectivity. The box above encloses the DMN area, and the box below encloses the PN area; these average network connectivity values are specified.

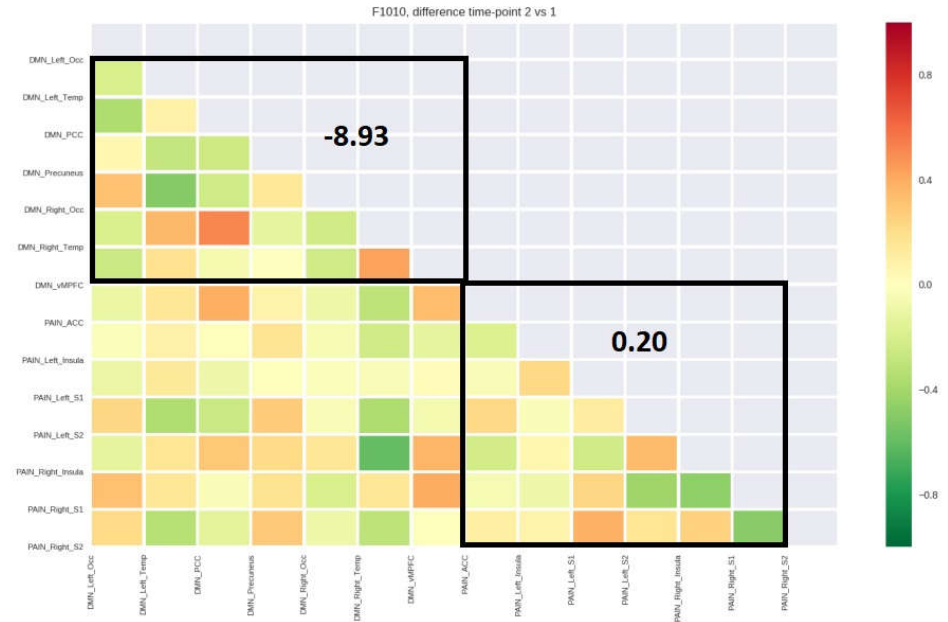

**Figure S4.** Matrix difference t2-t1 of the fourth patient, and DMN and PN average connectivity. The box above encloses the DMN area, and the box below encloses the PN area; these average network connectivity values are specified.

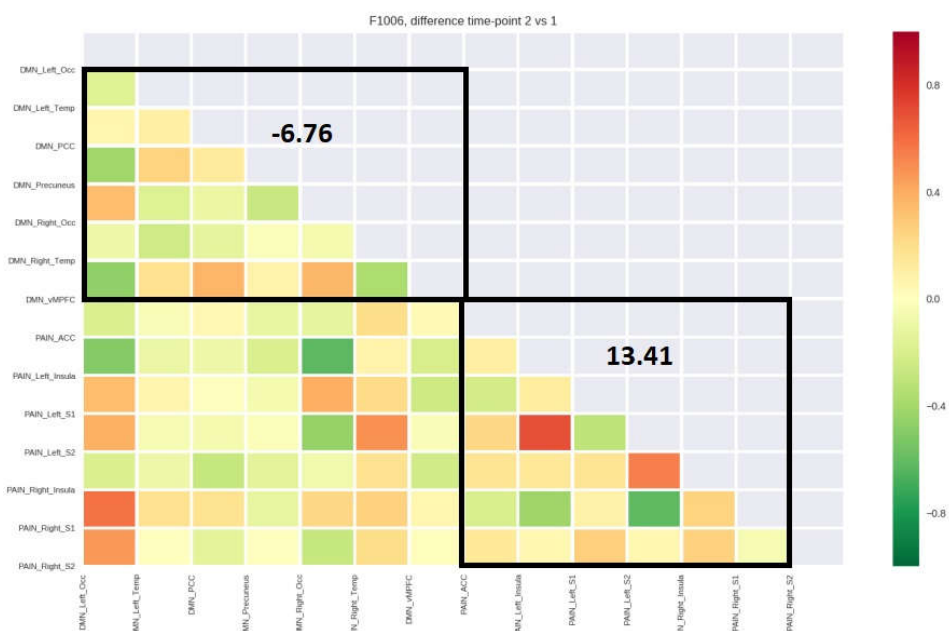

**Figure S5.** Matrix difference t2-t1 of the fifth patient, and DMN and PN average connectivity. The box above encloses the DMN area, and the box below encloses the PN area; these average network connectivity values are specified.

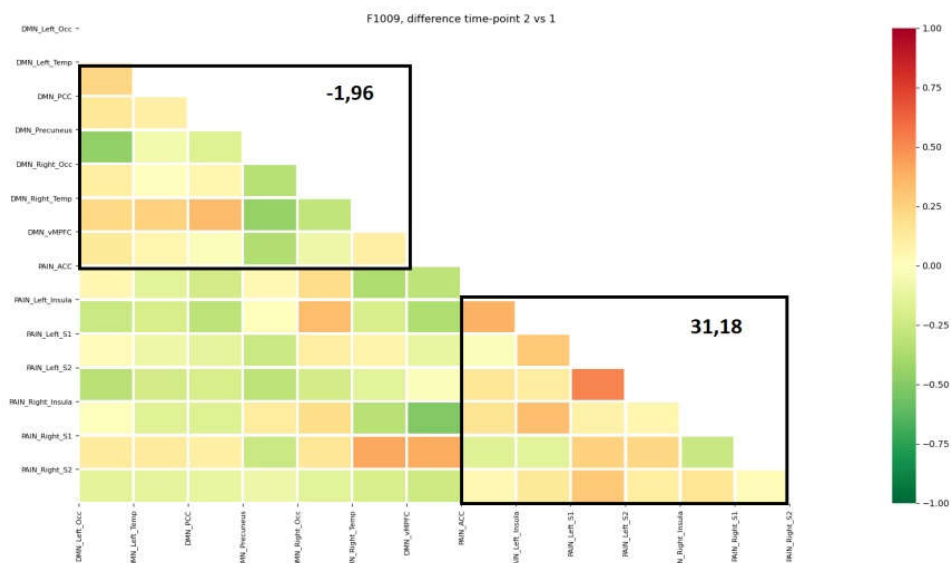

**Figure S6.** Matrix difference t2-t1 of the sixth patient, and DMN and PN average connectivity. The box above encloses the DMN area, and the box below encloses the PN area; these average network connectivity values are specified.

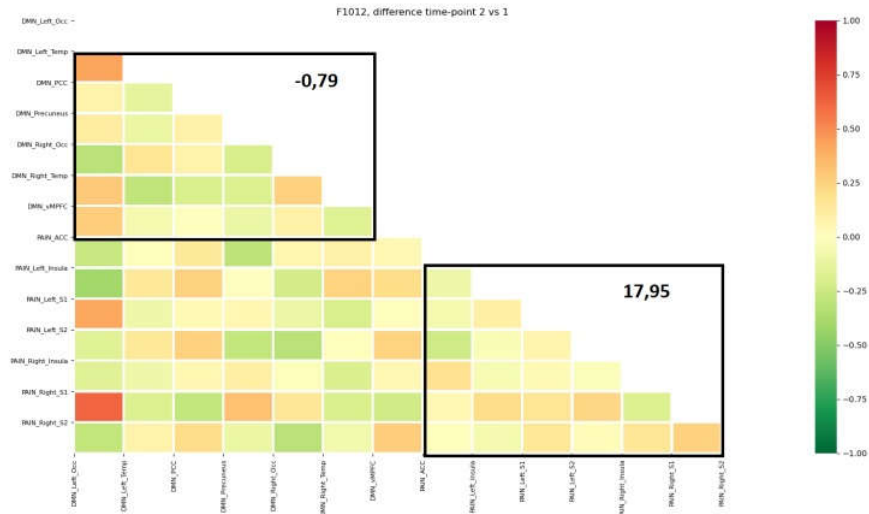

**Figure S7.** Matrix difference  $t_2-t_1$  of the seventh patient, and DMN and PN average connectivity. The box above encloses the DMN area, and the box below encloses the PN area; these average network connectivity values are specified.

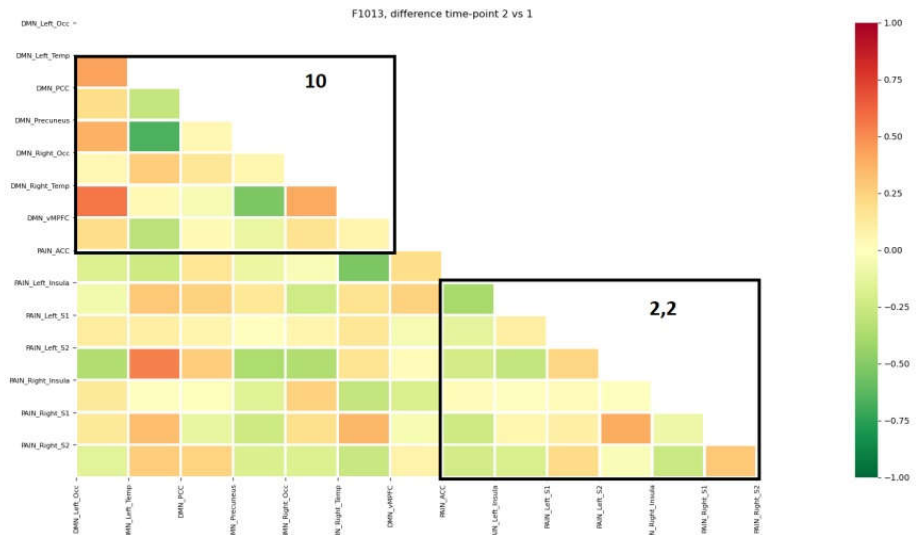

**Figure S8.** Matrix difference  $t_2-t_1$  of the eighth patient, and DMN and PN average connectivity. The box above encloses the DMN area, and the box below encloses the PN area; these average network connectivity values are specified.

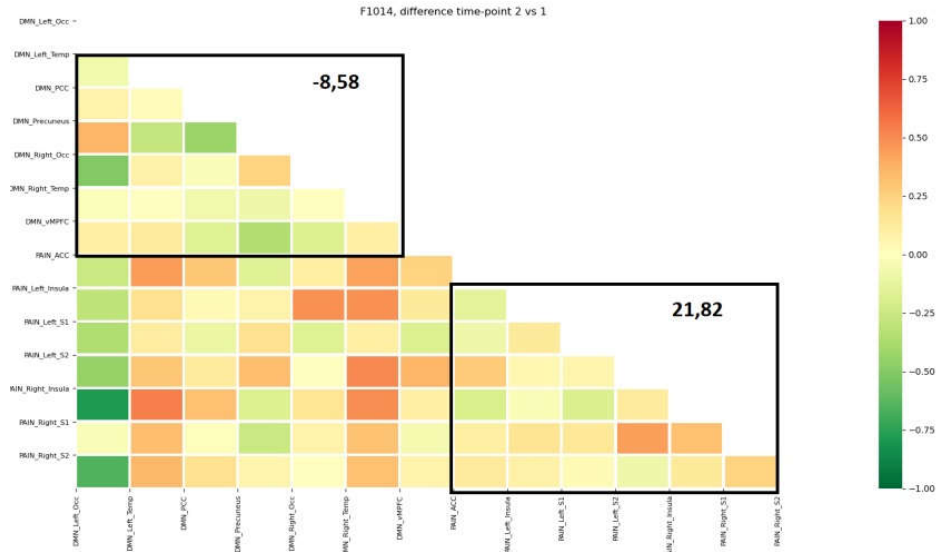

**Figure S9.** Matrix difference t2-t1 of the ninth patient, and DMN and PN average connectivity. The box above encloses the DMN area, and the box below encloses the PN area; these average network connectivity values are specified.

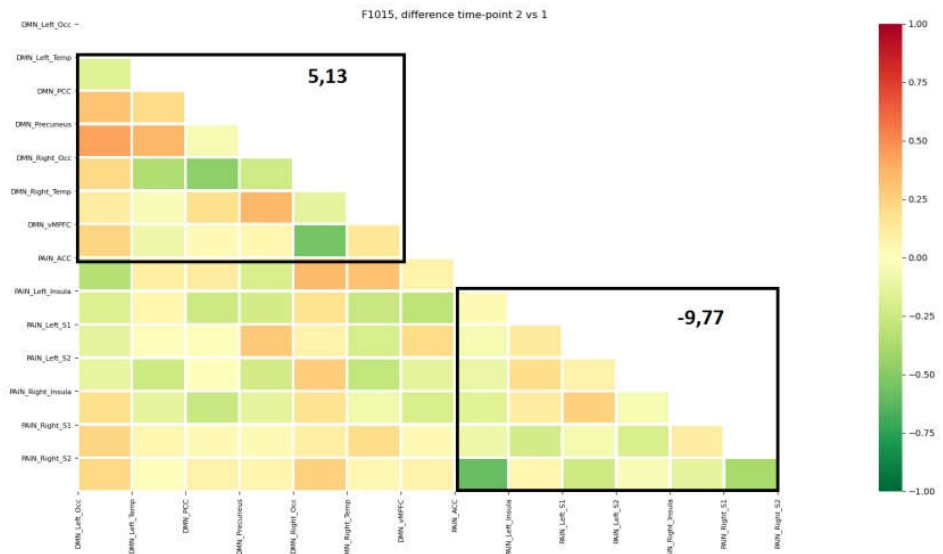

**Figure S10.** Matrix difference  $t_2-t_1$  of the tenth patient, and DMN and PN average connectivity. The box above encloses the DMN area, and the box below encloses the PN area; these average network connectivity values are specified.
